# Supplementary material for: Niche-adjacent Type IV collagen promotes GLP-1/Notch receptor activation in the C. elegans germline
Source: Research Square preprint supplement (doi:10.21203/rs.3.rs-4228526/v1), 2024-05-08
Supplement: Supplementary file 1 [file 255b5e94291a1a81a67c102d.docx]

**Extended Data Figure 1. Effect of *mig-*6*(qz2)* and *lon-*2*(e678)* on distal gonad elongation.** (**a**) Representative DIC micrographs of anterior gonad arms from adult hermaphrodites of the indicated genotypes (late L4 + 24h at 15C). Yellow dashed lines delineate the distal gonad. Yellow arrowheads mark gonadal bends, and white arrowheads mark distal extremities. A *Pmyo-3::mCherry* marker was used to mark the extrachromosomal *mig-6L(+)* transgene but the fluorescence signal is not shown in this image. (**b**) Boxplot scoring the distal gonad lengths (from the distal tip to the bend; see Methods) of adult hermaphrodites of the indicated genotypes (late L4 + 24h at 15C). Anterior and posterior gonad arm measurements were pooled together as they were similar. Sample sizes, from left to right: 34, 46, 17 gonad arms. (**c**) Boxplots scoring anterior (left) and posterior (right) distal gonad lengths of adult hermaphrodites of the indicated genotypes (late L4 + 24h at 15C). Sample sizes, from left to right: 17, 22, 19. (**b,c**) Asterisks (*) mark significant differences versus the control. One asterisk, p<0.05; two asterisks, p<0.01; by (**b**) one way ANOVA with Tukey’s multiple comparisons, (**c**) anterior: one way ANOVA with Tukey’s multiple comparisons, posterior: Kruskal-Wallis with Dunn’s multiple comparisons. (**d**) Representative single focal plane images of a posterior DTC containing region of a mid L4 hermaphrodite with endogenous *MIG-6L::mNG*, in control (left) or *qz2* mutants (right).


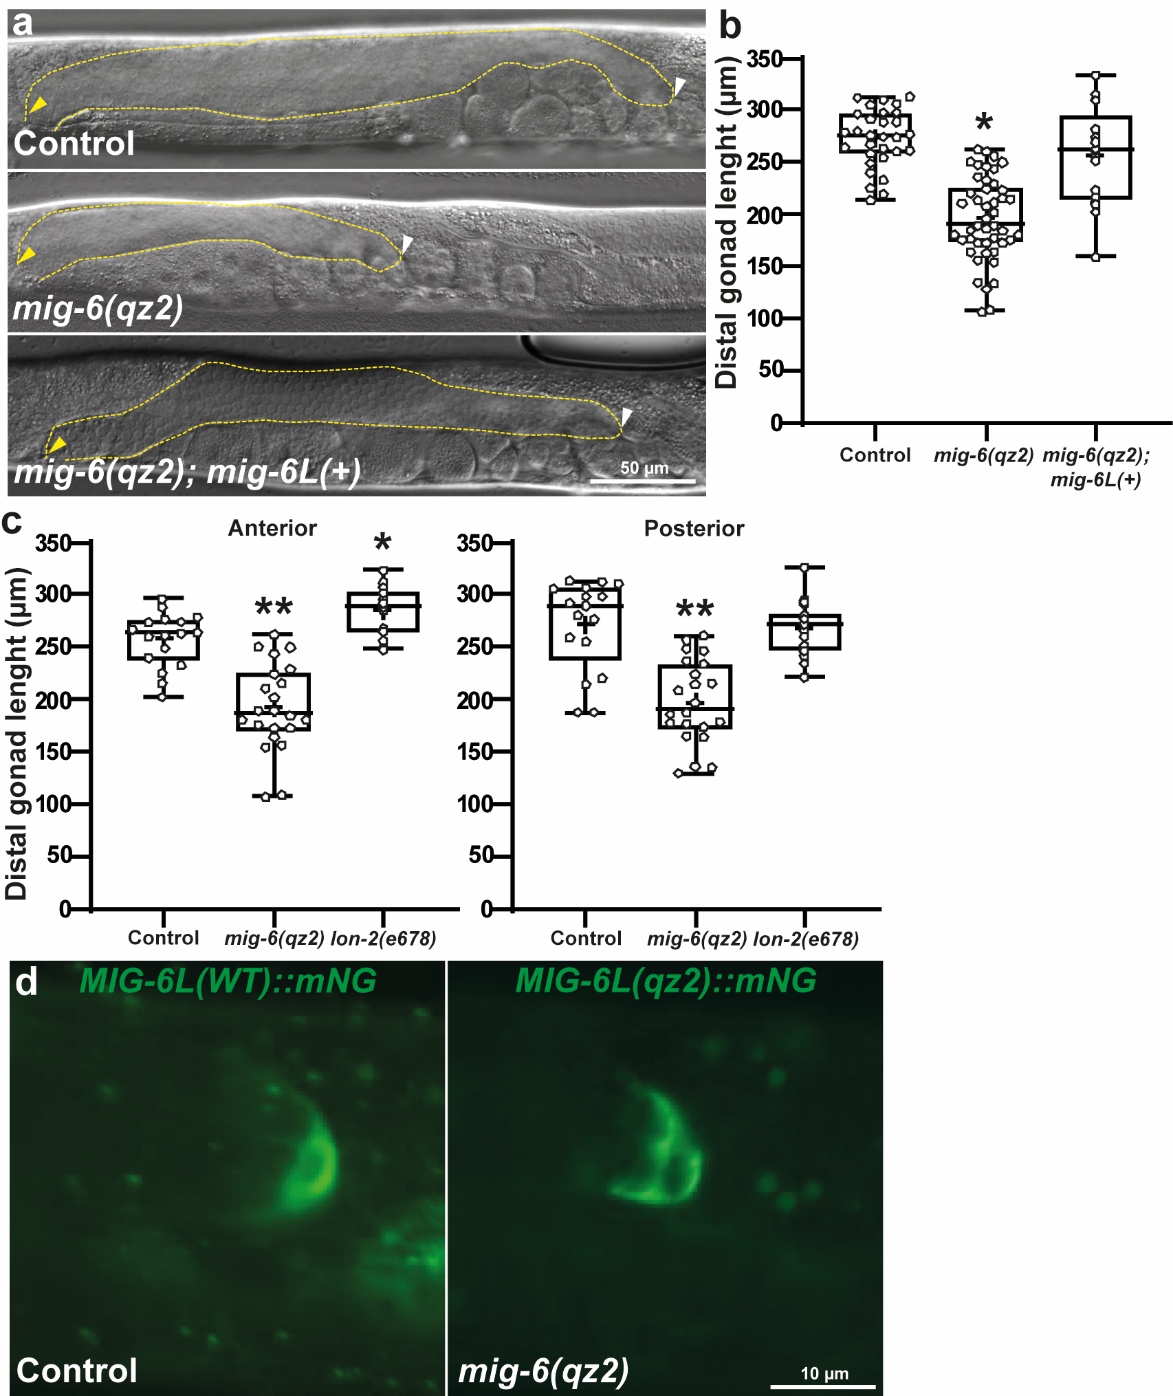


**Extended Data Figure 2. Reduced *mig-6L* activity does not impact *Plag-2::GFP* or *GLP-1(NICD)::GFP* expression.** (**a**) Boxplot scoring the total *Plag-2::GFP* fluorescence intensity in anterior and posterior DTCs of adult hermaphrodites of the indicated genotypes (mid L4 + 24h at 15C). Sample sizes, from left to right: 15, 12, 15, 15. (**b**) Boxplot scoring the total *GLP-1(NICD)::GFP* fluorescence intensity in anterior and posterior distal gonads of adult hermaphrodites of the indicated genotypes (mid L4 + 24h at 15C). Sample sizes, from left to right: 16, 14, 15, 14. (**a,b**) NS, Not significant (p>0.05) by (**a**) Kruskal-Wallis with Dunn’s multiple comparisons, (**b**) one way ANOVA with Tukey’s multiple comparisons.


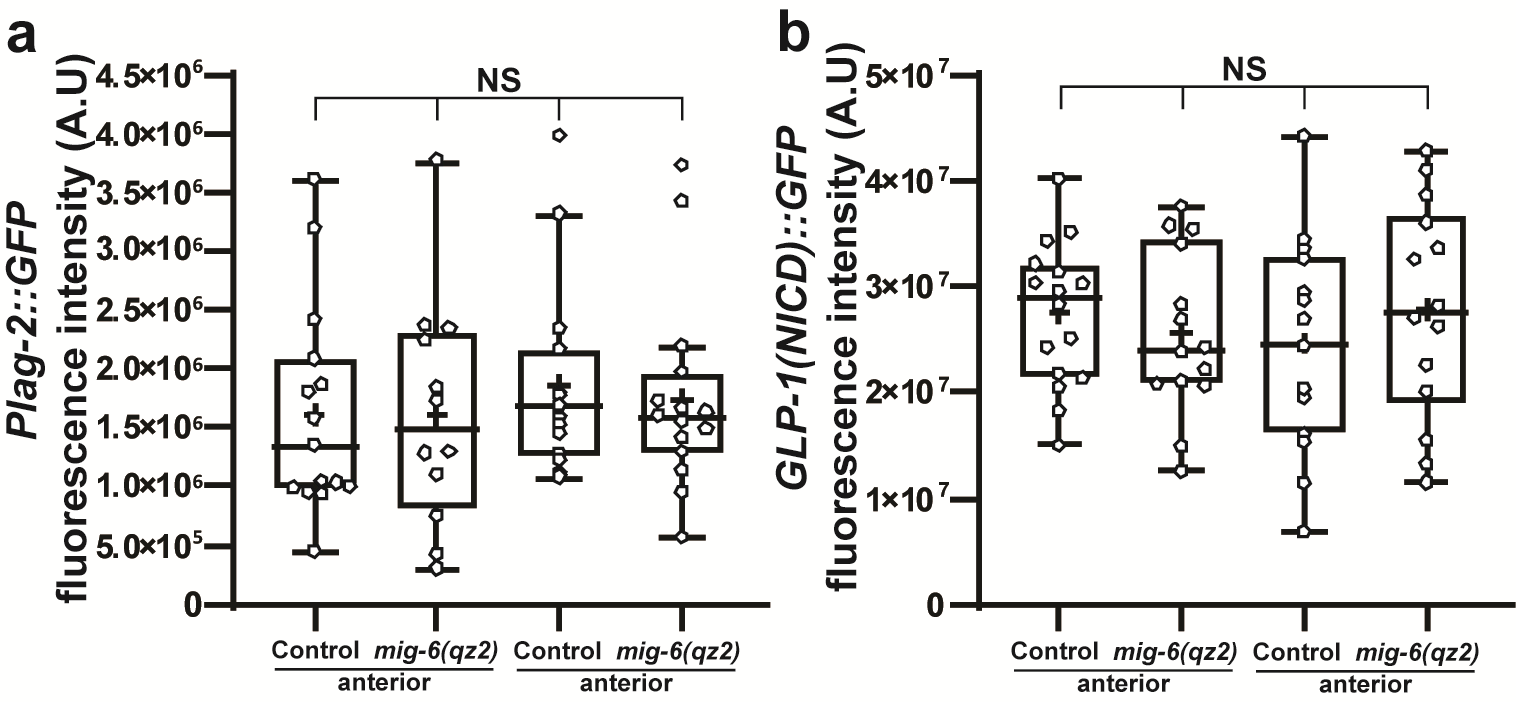


**Extended Data Figure 3. Effects of Notch signaling mutations on DTC-adjacent and global *EMB-9::mCherry* levels.** (**a**) Boxplots scoring the average *EMB-9::mCherry* fluorescence intensity overlapping with anterior (left) or posterior (right) DTCs of control and *glp-1(lf)* adult hermaphrodites (15C until L2 + 40 hours at 25C). Sample sizes, from left to right: 14, 18, 11, 16. (**b**) Boxplots scoring the average *EMB-9::mCherry* fluorescence intensity overlapping with anterior (left) or posterior (right) DTCs of control and *glp-1(gf)* adult hermaphrodites raised in parallel. Sample sizes, from left to right: 14, 15, 11, 10. (**a,b**) Note that when animals were upshifted to 25C from the L2 stage, the antero-posterior asymmetry in DTC-AC levels seen at 15C in control hermaphrodites (Fig. 2b) is no longer detected. (**c**) Boxplot scoring the average *EMB-9::mCherry* fluorescence intensity in a ≈40 x 20 x 5µm thick body wall muscle section (see Extended data Video 3) of adult hermaphrodites of the indicated genotypes (15C until L2 + 40 hours at 25C). Sample sizes, from left to right: 14, 11, 12, 10, 12. (**d**) Boxplot scoring the average *EMB-9::mCherry* fluorescence intensity in a ≈20 x 10 x 1µm thick distal gonad basement membrane section (see Extended data Video 3) located 20 µm from the DTC body of adult hermaphrodites of the indicated genotypes (15C until L2 + 40 hours at 25C) Sample sizes, from left to right: 15, 11, 13, 16, 15. Alleles: *glp-1(e2141)lf, glp-1(ar202)gf, gld-3(q730), nos-3(q650*. (**a-d**) Asterisks (*) mark significant differences versus the control. One asterisk, p<0.05; two asterisks, p<0.01; by (**a**) Welch’s t-test, (**b**) unpaired two-tailed t-test, (**c**,**d**) Brown-Forsythe and Welch’s ANOVA with Dunnett’s T3 multiple comparisons.


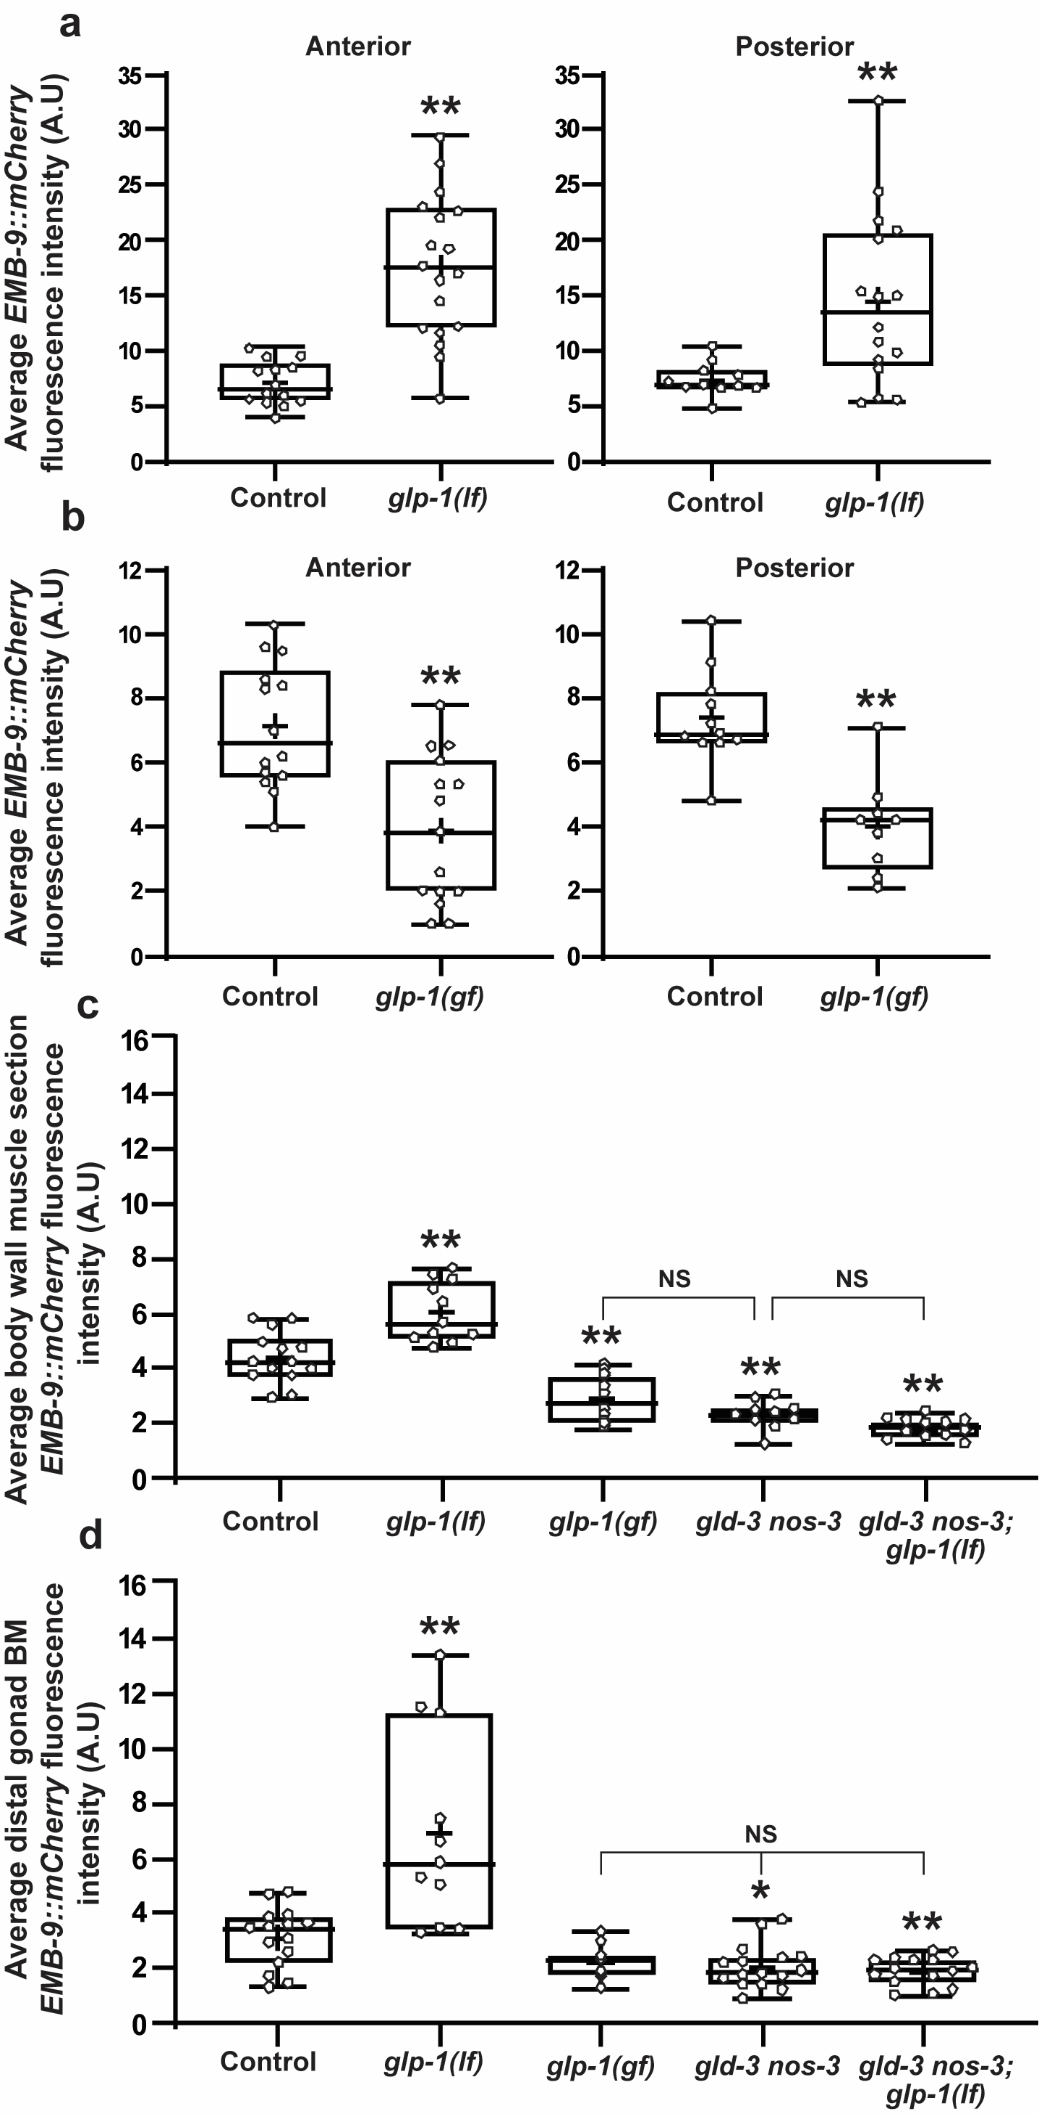


**Extended Data Figure 4.**  **Switchless SALSA baseline fluorescence ratios and Notch activity in *mig-6(qz2)* mutants.**

(**a**) Boxplot scoring baseline RFP/GFP fluorescence in anterior and posterior GSCs (located 1 to 5 cell diameters from the DTC) of SALSA switchless controls. Sample sizes, from left to right: 12, 11. (**b**) Boxplot scoring Notch activity in anterior and posterior gonad arms of *mig-6(qz2)* mutants, based on the average GSC SALSA RFP/GFP ratio. Sample sizes, from left to right: 12, 10. (**c**) Boxplot scoring the number of nuclei in *mig-6(qz2)*anterior and posterior PZs. Sample sizes, from left to right: 10, 10. (**a-c**) NS, Not significant (p>0.05) by unpaired two-tailed t-tests.


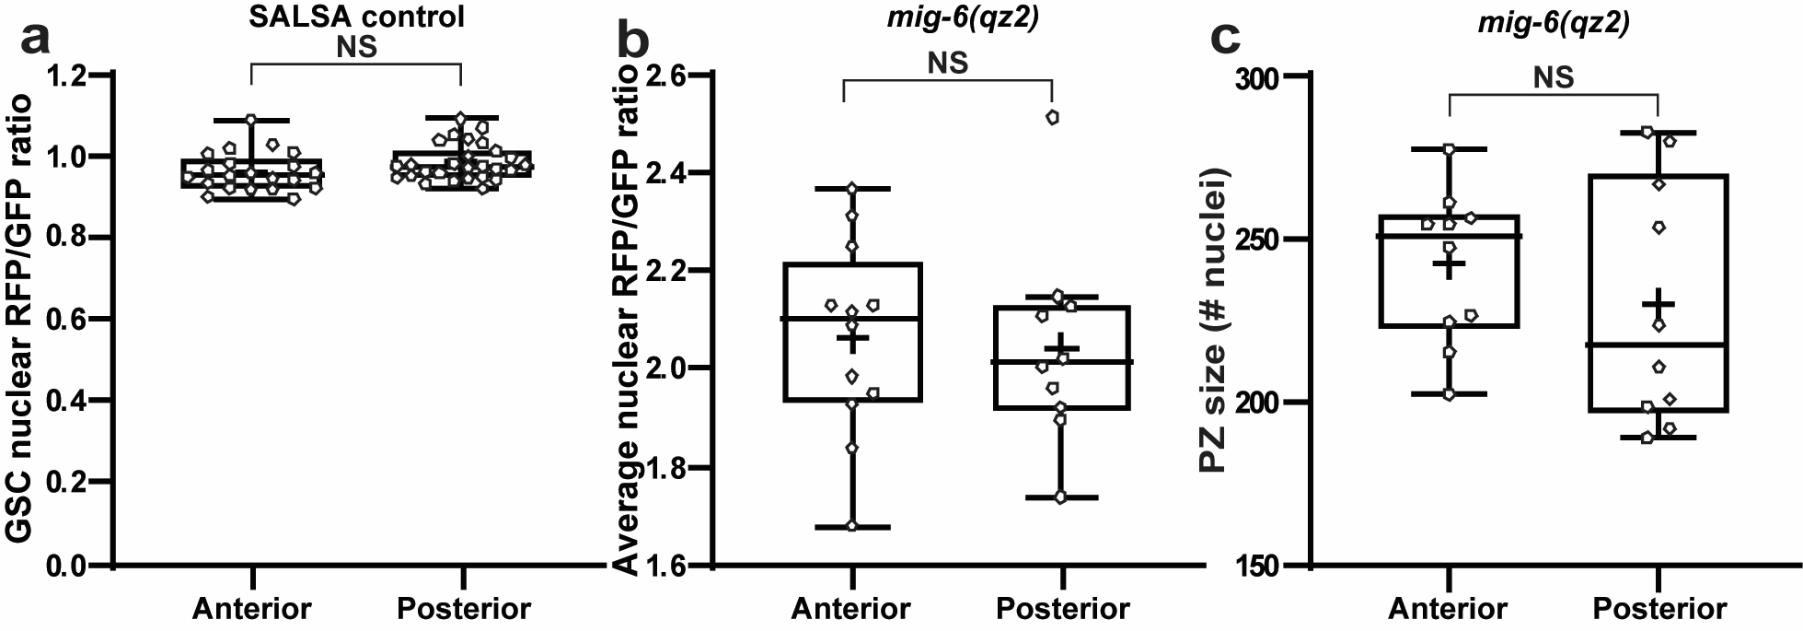


**Extended data Figure 5.** **Global *EMB-9::mCherry* distribution in *let-2(b246)* mutants**.

(a) Representative Imaris-generated 3D views showing a vulva centered section of *let-2(b246)* adult hermaphrodites grown for 24 hours after the mid-L4 stage at the permissive (15C, top), or restrictive (25C, bottom) temperature. A *PAT-2::mNG* transgene marks M-lines in the body wall muscles2 (green), and an *EMB-9::mCherry* transgene labels COL IV3 (red). Animals show obvious muscle COL IV accumulation and reduced basement membrane COL IV levels under restrictive conditions (25C).


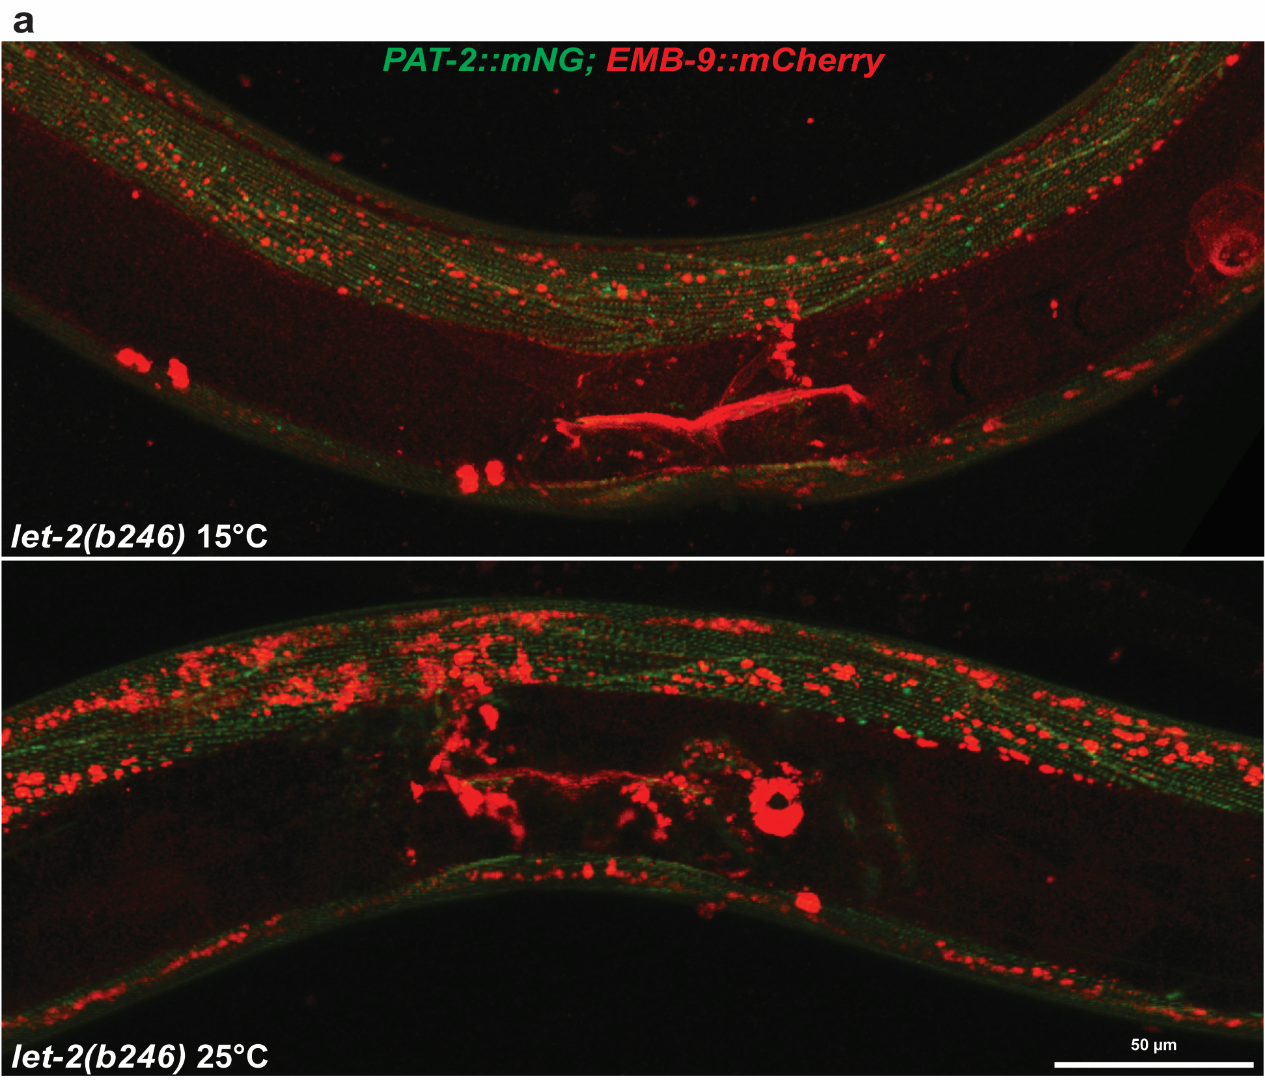


**Extended Data Table 1. Strains used.**

| **Strain** | **Genotype** | **References** |
| --- | --- | --- |
| N2 | Wild-type, Bristol (UK) isolate | 1 |
| BS4048 | *glp-1(q175)lf III; tnIs39[GLP-1::GFP::3xFLAG]IV* | Saravanapriah Nadarajan, David Greenstein, and Tim Schedl, personal communication |
| CB4037 | *glp-1(e2141)lf III* | 4 |
| GC833 | *glp-1(ar202)gf III* | 5 |
| GS9317 | *arSi85[Pmex-5::GFP::TCUT::mCherry::H2B::tbb-2 3’UTR] I* | 6 |
| GS9447 | *arSi85[Pmex-5::GFP::TCUT::mCherry::H2B::tbb-2 3’UTR] I; glp-1(ar648)[GLP-1::TEVp] III* | 6 |
| LP193 | *cpSi20[Pmex-5::tagRFP-T::PH::tbb-2 3'UTR; unc-119(+)] II; unc-119(ed3) III* | 7 |
| NK364 ◊ | *qyIs46[EMB-9::mCherry] X* | 3 |
| UM367 | *glp-1(ar202)gf III; mig-6L(qz2) V* | This paper |
| UM385 | *qzEx5[mig-6L(+); Pmyo-3::mCherry]* | This paper |
| UTR162 | *mig-6L(qz2) V* | This paper |
| UTR229 ◊ | *qIs57[Plag-2::GFP; unc-119(+)] II; qyIs46[EMB-9::mCherry] X* | This paper |
| UTR236* | *cpSi20[Pmex-5::tagRFP-T::PH::tbb-2 3'UTR; unc-119(+)] II; tnIs39[GLP-1::GFP::3xFLAG] IV* | This paper |
| UTR237* | *cpSi20[Pmex-5::tagRFP-T::PH::tbb-2 3'UTR; unc-119(+)] II; tnIs39[GLP-1::GFP::3xFLAG] IV; mig-6L(qz2) V* | This paper |
| UTR246 ◊ | *qIs57[Plag-2::GFP; unc-119(+)] II; mig-6L(qz2) V; qyIs46[EMB-9::mCherry] X* | This paper |
| UTR269 | *fog-1(q785) I/hT2 [bli-4(e937) let-?(q782) qIs48] (I;III); glp-1(ar202)gf III* | 8 |
| UTR289* | *cpSi20[Pmex-5::tagRFP-T::PH::tbb-2 3'UTR; unc-119(+)] II*; *tnIs39[GLP-1::GFP::3xFLAG] IV; lon-2(e678) X* | This paper |
| UTR310 | *mig-6L::mNG::5XFLAG V* | This paper |
| UTR312 ◊ | *qIs57[Plag-2::GFP; unc-119(+)] II; glp-1(e2141)lf III; qyIs46[EMB-9::mCherry] X* | This paper |
| UTR317 ◊ | *qIs57[Plag-2::GFP; unc-119(+)] II; lon-2(e678) qyIs46[EMB-9::mCherry] X* | This paper |
| UTR318 | *mig-6L(qz2)::mNG::5XFLAG V* | This paper |
| UTR319 ◊ | *qIs57[Plag-2::GFP; unc-119(+)] II; glp-1(ar202)gf III; qyIs46[EMB-9::mCherry] X* | This paper |
| UTR343 ◊ | *qIs57[Plag-2::GFP; unc-119(+)] II; daf-7(e1372) III; qyIs46[EMB-9::mCherry] X* | This paper |
| UTR344* | *cpSi20[Pmex-5::tagRFP-T::PH::tbb-2 3'UTR + unc-119(+)] II; daf-7(e1372) III; tnIs39[GLP-1::GFP::3xFLAG] IV* | This paper |
| UTR385 ◊ | *qIs56[Plag-2::GFP; unc-119(+)] V; qyIs46[EMB-9::mCherry] X* | This paper |
| UTR386 | *arSi85[Pmex-5::GFP::TCUT::mCherry::H2B::tbb-2 3’UTR] I; mig-6L(qz2) V* | This paper |
| UTR387 | *arSi85[Pmex-5p::GFP::TCUT::mCherry::H2B::tbb-2 3’UTR] I; glp-1(ar648) )[GLP-1::TEVp] III; mig-6L(qz2) V,* | This paper |
| UTR402 ◊ | *gld-3(q730) nos-3(q650)/mIn1 [mIs14 dpy-10(e128)] II; qIs56[Plag-2::GFP; unc-119(+)] V; qyIs46[EMB-9::mCherry] X* | This paper |
| UTR403 ◊ | *gld-3(q730) nos-3(q650)/mIn1 [mIs14 dpy-10(e128)] II; glp-1(e2141)lf III; qIs56[Plag-2::GFP; unc-119(+)] V; qyIs46[EMB-9::mCherry] X* | This paper |
| UTR433 | *glp-1(ar202)gf III; mig-6L(qz2) V; qzEx5[mig-6L(+); Pmyo-3::mCherry]* | This paper |
| UTR434 | *arSi85[Pmex-5p::GFP::TCUT::mCherry::H2B::tbb-2 3’UTR] I; glp-1(ar648) )[GLP-1::TEVp] III; let-2(b246) X* | This paper |
| UTR447 | *arSi85[Pmex-5p::GFP::TCUT::mCherry::H2B::tbb-2 3’UTR] I; let-2(b246) X* | This paper |
| UTR450 ◊ | *qIs57[Plag-2::GFP; unc-119(+)] II; let-2(b246) qyIs46[EMB-9::mCherry] X* | This paper |

*, Strains may or may not contain *unc-119(ed3)* and *glp-1(q175)*

◊, The position of *qyIs46* on chromosome X is not known.

**Extended Data Table 2. Plasmids used.**

| **Name** | **Description** | **Primers (5’->3’)** | **References** |
| --- | --- | --- | --- |
| pCFJ104 | *Pmyo-3::mCherry* | N/A | 9 |
| pKSII | Empty vector | N/A | N/A |
| pPOM18 | pDD162 + sgRNA1 for making *mig-6L::mNG::5XFLAG* | AAATTTAAAATTATGAACCCGTTTTAGAGCTAGAAATAGCAAGT  CAAGACATCTCGCAATAGG | This paper |
| pPOM19 | pDD162 + sgRNA2 for making *mig-6L::mNG::5XFLAG* | ATAATTTTAAATTTTAAGTTGTTTTAGAGCTAGAAATAGCAAGT  CAAGACATCTCGCAATAGG | This paper  pDD162 (Ref.10) |
| pPOM20 | pDD268 + *mig-6L(+)::mNG::5Xflag* repair template | ACGTTGTAAAACGACGGCCAGTCGCCGGCATTACGCCACTCCACTTTT  CATCGATGCTCCTGAGGCTCCCGATGCTCCGAACTTAAAATTATGAACCCGTGTGCAAGT  CGTGATTACAAGGATGACGATGACAAGAGATAAGTTTGGATTTTTTGATTTCAAATTTTC  GGAAACAGCTATGACCATGTTATCGATTTCCAGGTAAGGCAGGGAAATGA | This paper  pDD268 (Ref.11) |
| pPOM21 | pDD268 + *mig-6L(qz2)::mNG::5Xflag* repair template | ACGTTGTAAAACGACGGCCAGTCGCCGGCATTACGCCACTCCACTTTT  CATCGATGCTCCTGAGGCTCCCGATGCTCCGAACTTAAAATTATGAACCCGTGTGTAAGT  CGTGATTACAAGGATGACGATGACAAGAGATAAGTTTGGATTTTTTGATTTCAAATTTTC  GGAAACAGCTATGACCATGTTATCGATTTCCAGGTAAGGCAGGGAAATGA | This paper |
| pZH117 | *mig-6*L genomic/cDNA minigene | N/A | 12 |

**Extended data Video 1. GLP-1(NICD)::GFP Cleaving assay workflow**

The video starts with a close-up of a distal (distal is to the right) *GLP-1(NICD)::GFP;* *Pmex-5::TagRFP-T::PH* gonad section of a control adult (mid L4 + 24h at 15C) in which the green and red channels are overlayed. Then, a first 3D model is generated over the GSC membranes to generate a red alveoli-like structure. Next, another red surface is generated to enwrap the distal gonad as a whole and is used to delete the GFP locating outside of this object. Finally, images showing the total distal gonad GLP-1(NICD)::GFP signal, the GLP-1(NICD)::GFP signal localizing to the plasma membrane, and the GLP-1(NICD)::GFP localizing OFF from the membranes are successively shown.

**Extended data Video 2. SALSA quantification workflow**

The video begins with a 3D view of the distal gonad arms of the control adult hermaphrodite (15C until mid L4 + 24h at 25C) shown in Fig.5b. Spot clouds are first added for both gonad arms, and most aberrantly placed spots that do not correspond to germ nuclei are manually deleted. Further editions are made to preserve only the five first distal rows of germ nuclei for both gonad arms, and to delete any spot that are not accurately centered on a nucleus.

**Extended data Video 3. Body wall muscle and gonad basement membrane COL IV quantification workflow**

The video starts with a merge of the *Plag-2::GFP* and *EMB-9::mCherry* signals in a control adult hermaphrodite (mid L4 + 24h at 15C). First, a 3D model is thresholded based on the red channel to simultaneously fit body wall muscle and gonad basement membrane sections. Next, a ≈40 x 20 x 5µm thick body wall muscle section (shown in red) is extracted from the body wall muscle to evaluate its average *EMB-9::mCherry* fluorescence intensity. A smaller ≈20 x 10 x 1µm thick distal gonad basement membrane section, located 20 µm from the DTC body, is then extracted, this time to obtain the average distal gonad basement membrane *EMB-9::mCherry* fluorescence intensity.

**References**

1 Brenner, S. The genetics of Caenorhabditis elegans. *Genetics* **77**, 71-94 (1974).

2 Jayadev, R. *et al.* alpha-Integrins dictate distinct modes of type IV collagen recruitment to basement membranes. *J Cell Biol* **218**, 3098-3116 (2019). <https://doi.org:10.1083/jcb.201903124>

3 Ihara, S. *et al.* Basement membrane sliding and targeted adhesion remodels tissue boundaries during uterine-vulval attachment in Caenorhabditis elegans. *Nature cell biology* **13**, 641-651 (2011). <https://doi.org:10.1038/ncb2233>

4 Kodoyianni, V., Maine, E. M. & Kimble, J. Molecular basis of loss-of-function mutations in the glp-1 gene of Caenorhabditis elegans. *Mol Biol Cell* **3**, 1199-1213 (1992). <https://doi.org:10.1091/mbc.3.11.1199>

5 Pepper, A. S., Killian, D. J. & Hubbard, E. J. Genetic analysis of Caenorhabditis elegans glp-1 mutants suggests receptor interaction or competition. *Genetics* **163**, 115-132 (2003). <https://doi.org:10.1093/genetics/163.1.115>

6 Shaffer, J. M. & Greenwald, I. SALSA, a genetically encoded biosensor for spatiotemporal quantification of Notch signal transduction in vivo. *Developmental cell* **57**, 930-944 e936 (2022). <https://doi.org:10.1016/j.devcel.2022.03.008>

7 Heppert, J. K. *et al.* Comparative assessment of fluorescent proteins for in vivo imaging in an animal model system. *Mol Biol Cell* **27**, 3385-3394 (2016). <https://doi.org:10.1091/mbc.E16-01-0063>

8 Narbonne, P., Maddox, P. S. & Labbe, J. C. DAF-18/PTEN locally antagonizes insulin signalling to couple germline stem cell proliferation to oocyte needs in C. elegans. *Development* **142**, 4230-4241 (2015). <https://doi.org:10.1242/dev.130252>

9 Frokjaer-Jensen, C. *et al.* Single-copy insertion of transgenes in Caenorhabditis elegans. *Nature genetics* **40**, 1375-1383 (2008). <https://doi.org:10.1038/ng.248>

10 Dickinson, D. J., Ward, J. D., Reiner, D. J. & Goldstein, B. Engineering the Caenorhabditis elegans genome using Cas9-triggered homologous recombination. *Nat Methods* **10**, 1028-1034 (2013). <https://doi.org:10.1038/nmeth.2641>

11 Dickinson, D. J., Pani, A. M., Heppert, J. K., Higgins, C. D. & Goldstein, B. Streamlined Genome Engineering with a Self-Excising Drug Selection Cassette. *Genetics* **200**, 1035-1049 (2015). <https://doi.org:10.1534/genetics.115.178335>

12 Kawano, T. *et al.* C. elegans mig-6 encodes papilin isoforms that affect distinct aspects of DTC migration, and interacts genetically with mig-17 and collagen IV. *Development* **136**, 1433-1442 (2009). <https://doi.org:10.1242/dev.028472>
